# Supplementary material
Source: PubMed Central journal article supplement (PMC6402355)
Supplement: NIHMS983407-supplement-Supplemental_Files.pdf [file NIHMS983407-supplement-Supplemental_Files.pdf]

**Online Table 1, Part 1 of 2: Sensitivity Analyses - Descriptive Statistics Comparing Adolescents Included in and Excluded from Analytic Sample**

|                                                        | Adolescents in schools reporting the special education status of... |                                     |                                   |     |
|--------------------------------------------------------|---------------------------------------------------------------------|-------------------------------------|-----------------------------------|-----|
|                                                        | ...all sampled students (included)                                  | ...some sampled students (included) | ...no sampled students (excluded) |     |
| Missing special education status                       | 0.00                                                                | 0.73                                | 1.00                              | -   |
| School classification for any disability <sup>a</sup>  | 0.08                                                                | 0.11                                | 0.00                              | -   |
| School learning disability classification <sup>a</sup> | 0.05                                                                | 0.08                                | 0.00                              | -   |
| Male                                                   | 0.49                                                                | 0.51                                | 0.50                              | *** |
| Race:                                                  |                                                                     |                                     |                                   | *** |
| White, non-Hispanic                                    | 0.61                                                                | 0.54                                | 0.49                              |     |
| Black, non-Hispanic                                    | 0.11                                                                | 0.15                                | 0.16                              |     |
| Hispanic                                               | 0.14                                                                | 0.16                                | 0.16                              |     |
| Other                                                  | 0.14                                                                | 0.15                                | 0.20                              |     |
| Socioeconomic status                                   | 0.07                                                                | -0.05                               | 0.10                              | *** |
| <i>Linguistic-Immigration History</i>                  |                                                                     |                                     |                                   |     |
| Not a native English speaker                           | 0.15                                                                | 0.17                                | 0.22                              | *** |
| Degree to which lacks English proficiency              | 0.25                                                                | 0.31                                | 0.40                              | *** |
| Ever in an English as a Second Language program        | 0.08                                                                | 0.09                                | 0.10                              | *** |
| Started school in United States:                       |                                                                     |                                     |                                   | *** |
| In kindergarten                                        | 0.94                                                                | 0.93                                | 0.91                              |     |
| Between 1st and 2nd grades                             | 0.01                                                                | 0.01                                | 0.01                              |     |
| Between 3rd and 5th grades                             | 0.02                                                                | 0.02                                | 0.03                              |     |
| Between 6th and 10th grades                            | 0.03                                                                | 0.04                                | 0.05                              |     |
| <i>Educational Performance</i>                         |                                                                     |                                     |                                   |     |
| Average 10th grade test score                          | 51.40                                                               | 49.38                               | 51.17                             | *   |

Note: With the exception of the first three rows, students in special education for a disability other than a learning disability (n=300) are excluded from this table.

a - Students without special education status included in denominator.

+p < 0.10, \*p < 0.05, \*\*p < 0.01, \*\*\*p < 0.001 (two-tailed test).

**Online Table 1, Part 2 of 2: Sensitivity Analyses - Descriptive Statistics Comparing Adolescents Included in and Excluded from Analytic Sample**

|                                                  | Adolescents in schools reporting the special education status of... |                                     |                                   |     |
|--------------------------------------------------|---------------------------------------------------------------------|-------------------------------------|-----------------------------------|-----|
|                                                  | ...all sampled students (included)                                  | ...some sampled students (included) | ...no sampled students (excluded) |     |
| <i>School Characteristics</i>                    |                                                                     |                                     |                                   |     |
| Percent students eligible for free lunch program | 20.85                                                               | 22.84                               | 21.83                             | *** |
| Percent students racial minorities               | 32.13                                                               | 35.02                               | 43.66                             | *** |
| School type:                                     |                                                                     |                                     |                                   |     |
| Public                                           | 0.76                                                                | 0.94                                | 0.64                              |     |
| Catholic                                         | 0.15                                                                | 0.04                                | 0.17                              |     |
| Other private                                    | 0.08                                                                | 0.02                                | 0.18                              |     |
| School region:                                   |                                                                     |                                     |                                   | *** |
| Northeast                                        | 0.17                                                                | 0.22                                | 0.17                              |     |
| Midwest                                          | 0.28                                                                | 0.27                                | 0.17                              |     |
| South                                            | 0.38                                                                | 0.34                                | 0.36                              |     |
| West                                             | 0.18                                                                | 0.17                                | 0.30                              |     |
| School urbanicity:                               |                                                                     |                                     |                                   | *** |
| Suburban                                         | 0.49                                                                | 0.49                                | 0.45                              |     |
| Urban                                            | 0.31                                                                | 0.27                                | 0.47                              |     |
| Rural                                            | 0.20                                                                | 0.24                                | 0.08                              |     |
| Adolescents (n)                                  | 6,960                                                               | 4,710                               | 4,210                             |     |

Note: With the exception of the first three rows, students in special education for a disability other than a learning disability (n=300) are excluded from this table.

a - Students without special education status included in denominator.

+p < 0.10, \*p < 0.05, \*\*p < 0.01, \*\*\*p < 0.001 (two-tailed test).

**Online Table 2, Part 1 of 2: Sensitivity Analyses - Odds Ratios from Random Effects Logistic Regression Models Predicting Adolescent Classified with a Learning Disability Using Different Samples**

|                                                        | Model 1 - Unadjusted Race and Gender Differences |            |                    |            | Model 2 - Adjusted Race and Gender Differences |            |                    |            |
|--------------------------------------------------------|--------------------------------------------------|------------|--------------------|------------|------------------------------------------------|------------|--------------------|------------|
|                                                        | Alternate sample 1                               |            | Alternate sample 2 |            | Alternate sample 1                             |            | Alternate sample 2 |            |
|                                                        | Exp(B)                                           | (SE)       | Exp(B)             | (SE)       | Exp(B)                                         | (SE)       | Exp(B)             | (SE)       |
| Male                                                   | 2.14                                             | *** (0.07) | 2.67               | *** (0.32) | 2.07                                           | *** (0.20) | 2.63               | *** (0.36) |
| Race (ref=White, non-Hispanic):                        |                                                  |            |                    |            |                                                |            |                    |            |
| Black, non-Hispanic                                    | 1.22                                             | *** (0.06) | 1.51               | * (0.27)   | 0.57                                           | *** (0.09) | 0.60               | * (0.13)   |
| Hispanic                                               | 1.31                                             | *** (0.06) | 1.52               | * (0.25)   | 0.83                                           | (0.14)     | 0.76               | (0.17)     |
| Other race                                             | 0.72                                             | *** (0.04) | 0.98               | (0.18)     | 0.81                                           | (0.13)     | 0.87               | (0.20)     |
| Socioeconomic status                                   |                                                  |            |                    |            | 1.02                                           | (0.08)     | 0.99               | (0.11)     |
| <i>Linguistic-Immigration History</i>                  |                                                  |            |                    |            |                                                |            |                    |            |
| Not a native English speaker                           |                                                  |            |                    |            | 0.83                                           | (0.16)     | 0.98               | (0.25)     |
| Degree lacking English proficiency                     |                                                  |            |                    |            | 1.06                                           | (0.05)     | 1.11               | (0.07)     |
| Ever in an English as a Second Language program        |                                                  |            |                    |            | 1.09                                           | (0.19)     | 1.32               | (0.30)     |
| Started school in United States (ref=In kindergarten): |                                                  |            |                    |            |                                                |            |                    |            |
| Between 1st and 2nd grades                             |                                                  |            |                    |            | 0.74                                           | (0.32)     | 0.68               | (0.37)     |
| Between 3rd and 5th grades                             |                                                  |            |                    |            | 0.27                                           | (0.20)     | 0.20               | (0.20)     |
| Between 6th and 10th grades                            |                                                  |            |                    |            | 0.09                                           | *** (0.04) | 0.08               | * (0.08)   |
| <i>Educational Performance</i>                         |                                                  |            |                    |            |                                                |            |                    |            |
| Average 10th grade test score                          |                                                  |            |                    |            | 0.83                                           | *** (0.01) | 0.82               | *** (0.01) |

Note: This study's main analytic sample included adolescents whose schools reported the special education status of all or some sampled students (11,670 adolescents in 546 schools). Alternate sample 1 includes adolescents whose schools reported the special education status of all, some, and no sampled students (15,890 adolescents in 751 schools). Alternate sample 2 only includes adolescents whose schools reported the special education status of all sampled students (6,960 adolescents in 334 schools). 'ref'=reference group.

+p < .10, \*p < .05, \*\*p < .01, \*\*\*p < .001 (two-tailed test).

**Online Table 2, Part 2 of 2: Sensitivity Analyses - Odds Ratios from Random Effects Logistic Regression Models Predicting Adolescent Classified with a Learning Disability Using Different Samples**

|                                                                                    | Model 1, continued - Unadjusted Race and Gender Differences |      |                    |      | Model 2, continued - Adjusted Race and Gender Differences |            |                    |          |
|------------------------------------------------------------------------------------|-------------------------------------------------------------|------|--------------------|------|-----------------------------------------------------------|------------|--------------------|----------|
|                                                                                    | Alternate sample 1                                          |      | Alternate sample 2 |      | Alternate sample 1                                        |            | Alternate sample 2 |          |
|                                                                                    | Exp(B)                                                      | (SE) | Exp(B)             | (SE) | Exp(B)                                                    | (SE)       | Exp(B)             | (SE)     |
| <i>School Characteristics</i>                                                      |                                                             |      |                    |      |                                                           |            |                    |          |
| School type (ref=Public):                                                          |                                                             |      |                    |      |                                                           |            |                    |          |
| Catholic                                                                           |                                                             |      |                    |      | 0.42                                                      | ** (0.12)  | 0.48               | * (0.16) |
| Private                                                                            |                                                             |      |                    |      | 0.18                                                      | *** (0.07) | 0.31               | * (0.15) |
| School region (ref=Northeast):                                                     |                                                             |      |                    |      |                                                           |            |                    |          |
| Midwest                                                                            |                                                             |      |                    |      | 0.78                                                      | (0.14)     | 1.05               | (0.25)   |
| South                                                                              |                                                             |      |                    |      | 0.70                                                      | + (0.13)   | 0.94               | (0.22)   |
| West                                                                               |                                                             |      |                    |      | 0.41                                                      | *** (0.09) | 0.47               | * (0.14) |
| School urbanicity (ref=Suburban):                                                  |                                                             |      |                    |      |                                                           |            |                    |          |
| Rural                                                                              |                                                             |      |                    |      | 1.44                                                      | * (0.23)   | 1.20               | (0.23)   |
| Urban                                                                              |                                                             |      |                    |      | 0.90                                                      | (0.15)     | 1.09               | (0.23)   |
| Percent students racial minorities                                                 |                                                             |      |                    |      | 0.99                                                      | + (0.00)   | 1.00               | (0.00)   |
| Percent students eligible for free lunch program (ref=Quartile 1 (least poverty)): |                                                             |      |                    |      |                                                           |            |                    |          |
| Quartile 2                                                                         |                                                             |      |                    |      | 0.88                                                      | (0.16)     | 0.93               | (0.21)   |
| Quartile 3                                                                         |                                                             |      |                    |      | 0.80                                                      | (0.16)     | 0.57               | * (0.15) |
| Quartile 4 (most poverty)                                                          |                                                             |      |                    |      | 0.68                                                      | (0.17)     | 0.44               | * (0.16) |

Note: This study's main analytic sample included adolescents whose schools reported the special education status of all or some sampled students (11,670 adolescents in 546 schools). Alternate sample 1 includes adolescents whose schools reported the special education status of all, some, and no sampled students (15,890 adolescents in 751 schools). Alternate sample 2 only includes adolescents whose schools reported the special education status of all sampled students (6,960 adolescents in 334 schools). 'ref'=reference group. +p < .10, \*p < .05, \*\*p < .01, \*\*\*p < .001 (two-tailed test).
